# Supplementary material
Source: ML conference proceedings conference paper supplement (https://openaccess.thecvf.com/content/cvpr_2017/html/Cavallari_On-The-Fly_Adaptation_of_2017_CVPR_paper.html)
Supplement: Supplementary file 1 [file Cavallari_On-The-Fly_Adaptation_of_2017_CVPR_supplemental.zip]

Archive with 2 entries (2 files):
- 1821-supp.mp4
- 1821-supp.pdf
